# Supplementary material for: Balancing the CD38 Expression on Effector and Target Cells in Daratumumab-Mediated NK Cell ADCC against Multiple Myeloma
Source: MDPI journal article supplement (doi:10.3390/cancers13123072), 2021-06-20
Supplement: s1 [file s1]

# Balancing the CD38 Expression on Effector and Target Cells in Daratumumab-Mediated NK Cell ADCC against Multiple Myeloma

Margaux Lejeune <sup>1</sup>, Elodie Duray <sup>1</sup>, Matthias Peipp <sup>2</sup>, Béatrice Clémenceau <sup>3</sup>, Frédéric Baron <sup>1,4</sup>, Yves Beguin <sup>1,4</sup> and Jo Caers <sup>1,4,\*</sup>

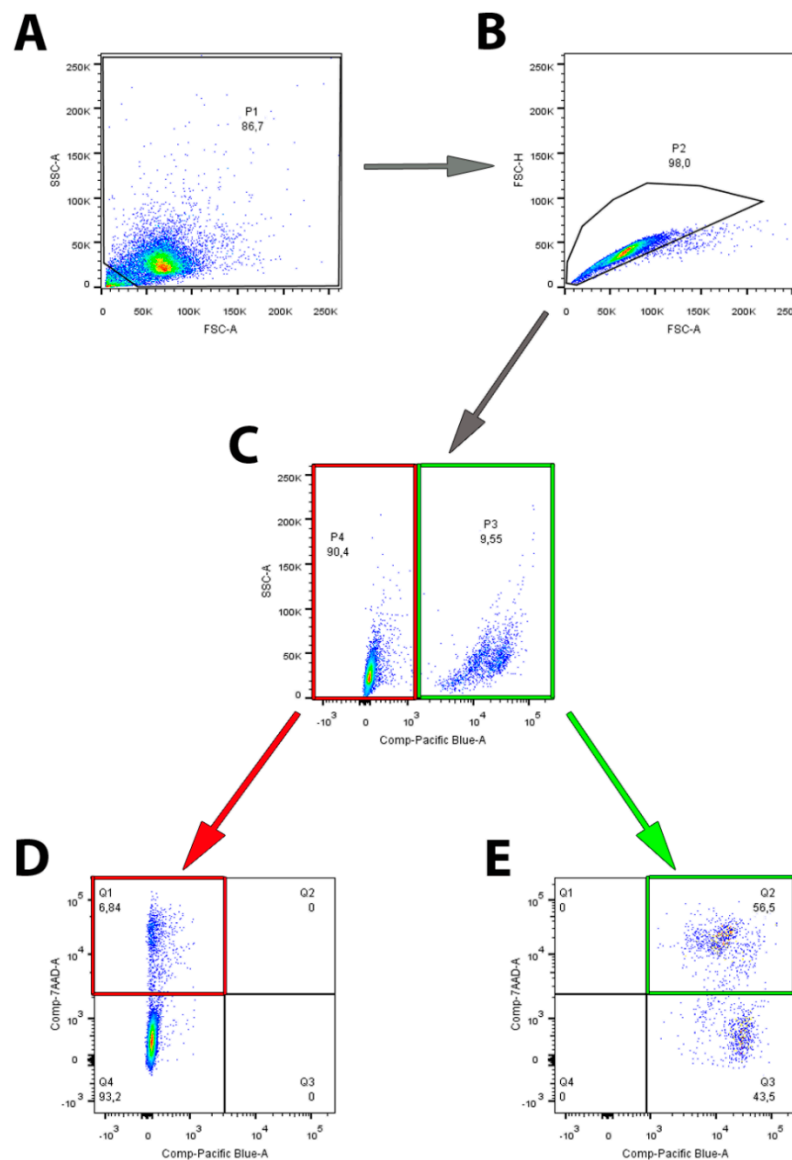

**Figure S1.** Gating strategy for NK-92 – dependent tumor cell cytotoxicity measured by 6 hours flow cytometry. **(A)** The entire cell population is taken into account on the FSC-SSC plots, except for the debris at the bottom left, and **(B)** single cells ('singlets') are retained. **(C)** Cells are then discriminated into target cells (green) and effector cells (red) thanks to violet dye which is positive only for target cells. **(D)** We then take into account percentage of dead cells (7-AAD +) in negative-violet dye population to assess fratricide. **(E)** In parallel, we assess percentage of dead cells (7-AAD +) positive-violet dye population to assess cytotoxicity.

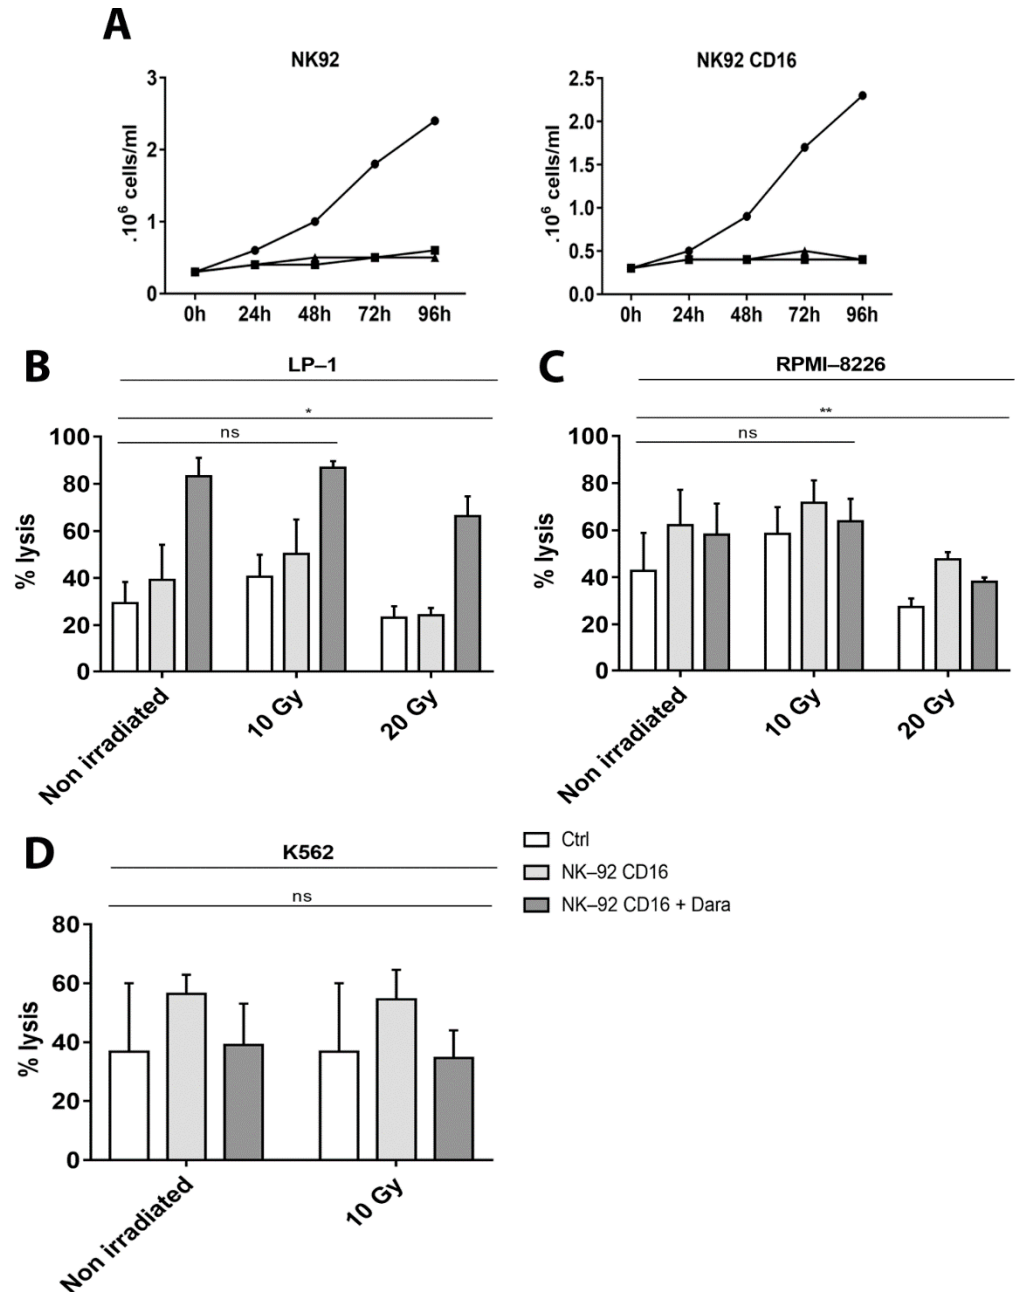

**Figure S2.** NK-92 – dependent tumor cell cytotoxicity measured by 6 hours flow cytometry-based assay with CD38-expressing target cells. **(A)** Effect of irradiation on the proliferation of NK-92 and NK-92 CD16 cells. Lysis percentages of LP-1 **(B)**, RPMI-8226 **(C)** and K562 **(D)** cells after 6 hours of incubation and in the presence of non-irradiated or irradiated with 10 or 20 Gy NK-92 CD16 cells (effector/target cells=10:1). The following conditions were tested: with or without (NK-92 CD16) or NK-92 CD16 combined with daratumumab. There is no significant difference between ADCC results without prior irradiation or after 10 Gy irradiation of NK-92 CD16 cells for LP-1 cell line **(B)**, RPMI-8226 cell line **(C)**, or negative control leukemia cell line K562 **(D)**. On the other hand, we were able to observe a significant decrease in percentages of ADCC following irradiation of 20 Gy of NK-92 CD16 cells. All data are representative of fifteen (for non-irradiated cells) and four (for irradiated cells) ( $n = 15$  or  $4$ ) independent experiments and represented as mean  $\pm$  standard error. ns: non-significant. \*:  $p < 0.05$ . \*\*:  $p < 0.01$ .

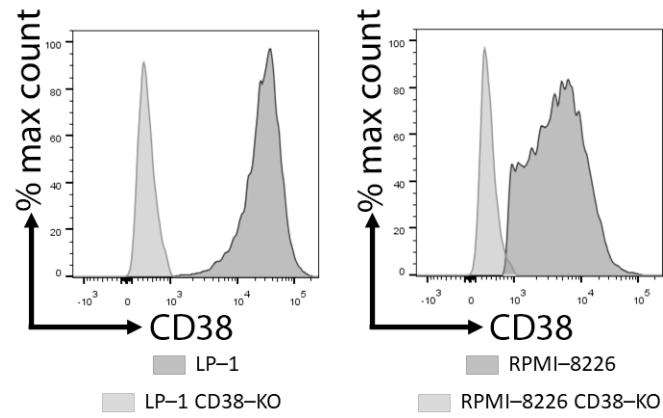

**Figure S3.** Human multiple myeloma cell lines, including LP-1 and RPMI-8226 cells, overexpressed CD38. We inactivated CD38 gene by using the CRISPR/Cas9 technology, to obtain CD38KO cell lines. CD38 expression was assessed by flow cytometry. Results are representative of three independent experiments ( $n = 3$ ). We confirmed that parental cell lines present varying levels of CD38 expression while CD38-KO cell lines no longer express CD38.

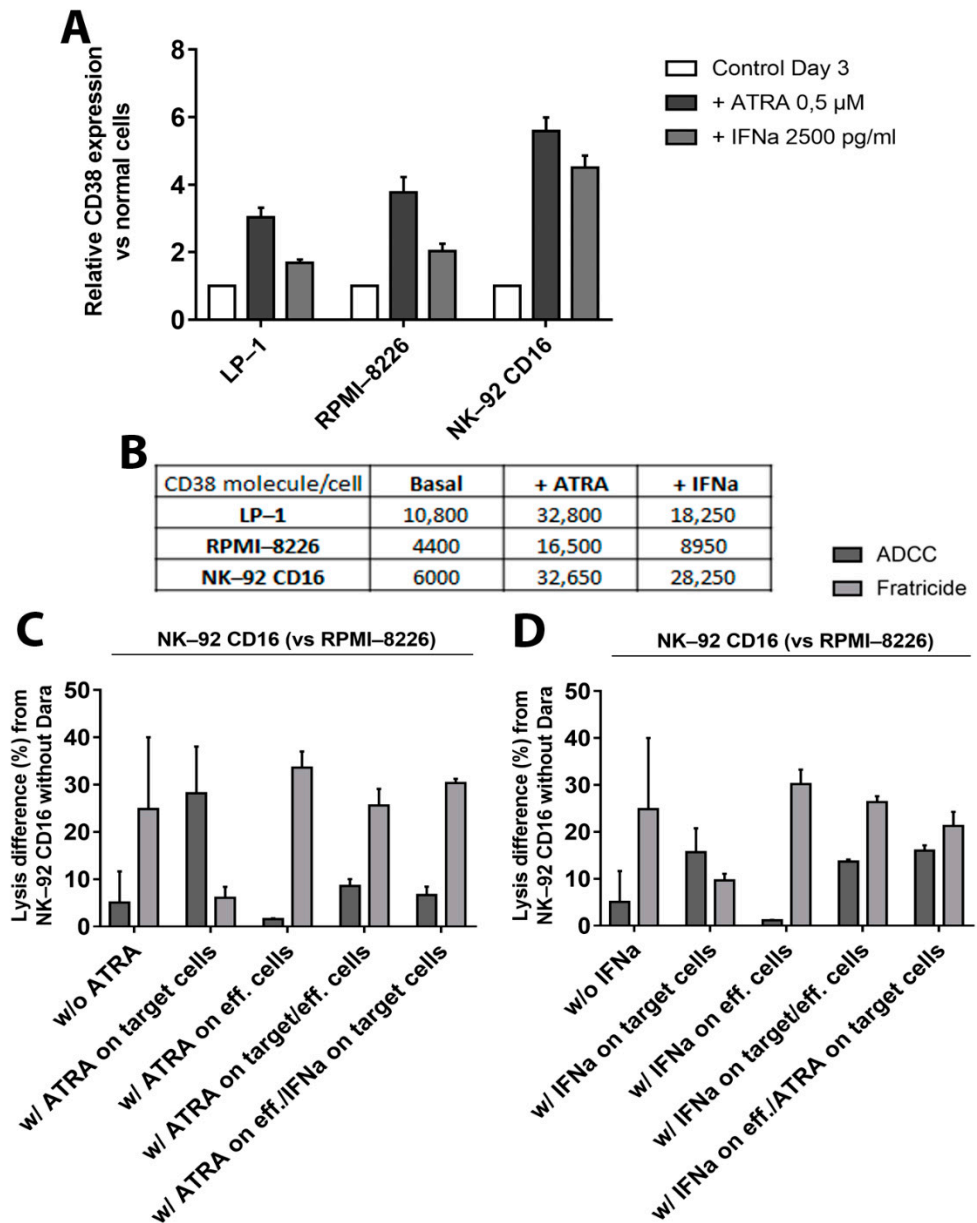

**Figure S4.** The effect of increasing CD38 density on NK-92 – dependent tumor cell cytotoxicity, measured by calcein release assay. **(A)** Relative expressions of CD38 and **(B)** quantification of the number of CD38 molecules per cell after 3 days incubation of LP-1, RPMI-8226 and NK-92 CD16 with 0.5  $\mu$ M of ATRA or with 2500 pg/ml of IFN $\alpha$  compared to cells alone. **(C)** Preincubation of target or effector cells with ATRA and the effects on ADCC (dark grey) and fratricide (light grey). Each graph shows the results obtained without pre-incubation with adjuvants (w/o ATRA or IFN $\alpha$ ), after pre-incubation of target cells with adjuvants (w/ ATRA or IFN $\alpha$  on target cells), after pre-incubation of effector cells with adjuvants (w/ ATRA or IFN $\alpha$  on eff. cells) or after pre-incubation of target and effector cells with adjuvants (w/ ATRA or IFN $\alpha$  on target cells). These results were observed after 4 hours of incubation and at effector to target cells ratio of 1:1. All data are representative of at least 3 independent experiments and represented as mean  $\pm$  standard error.

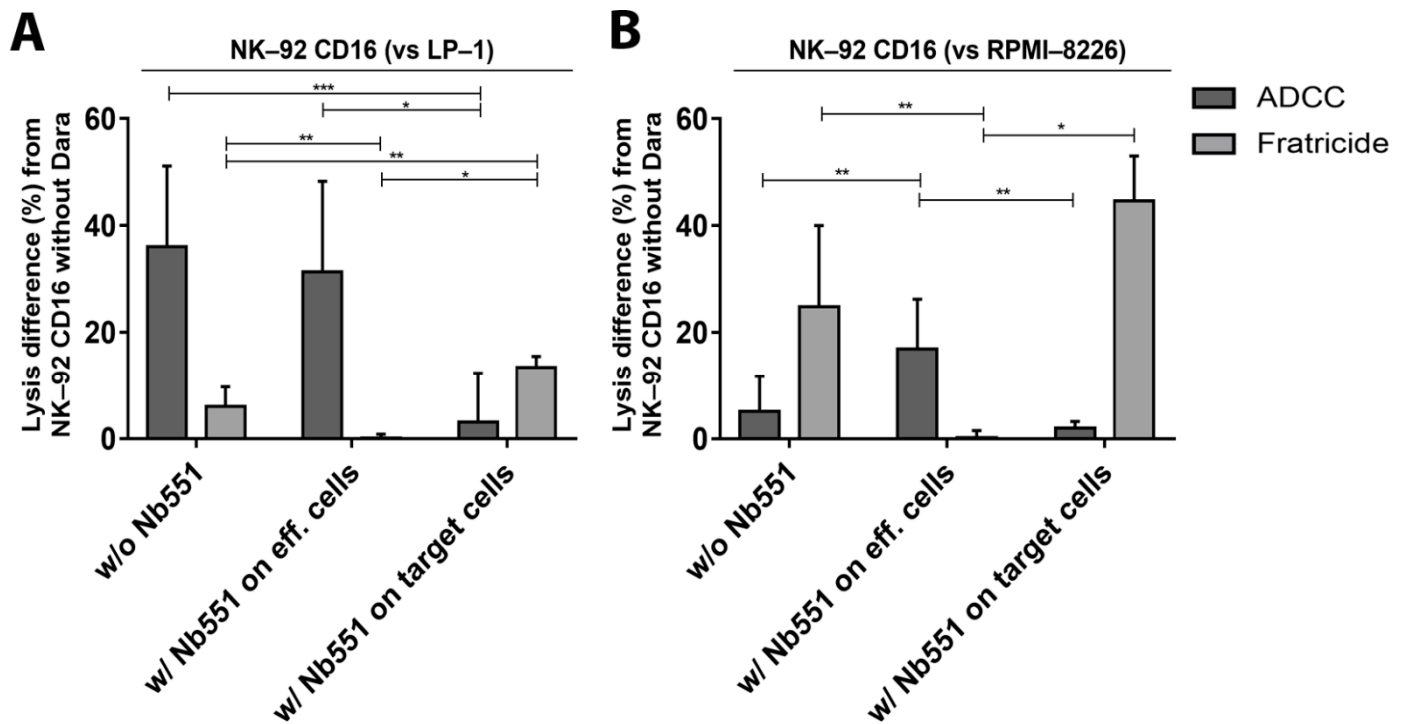

**Figure S5.** The effect of a blocking anti-CD38 nanobody (Nb551) on NK-92 – dependent tumor cell cytotoxicity measured by calcein release assay. Target-cell lysis (ADCC) and effector-cell lysis (Fratricide) in LP-1 (**A**) or RPMI-8226 (**B**) and NK-92 CD16 co-cultures without the presence of Nb551 (w/o Nb551), after pre-incubation of effector cells with Nb551 (w/ Nb551 on eff. cells) or after pre-incubation of target cells with Nb551 (w/ Nb551 on target cells). These results were observed after 4 hours of incubation and at effector to target cells ratio of 1:1. All data are representative of at least 4 independent experiments and represented as mean  $\pm$  standard error. \*:  $p < 0.05$ . \*\*:  $p < 0.01$ . \*\*\*:  $p < 0.001$ .

□ NK-92 CD16 + Dara      ■ (ATRA) NK-92 CD16 + Dara      ▨ (ATRA) NK-92 CD16 + Z199 + Dara  
 ▤ NK-92 CD16 + Z199 + Dara      ▥ (IFNα) NK-92 CD16 + Dara      ▧ (IFNα) NK-92 CD16 + Z199 + Dara

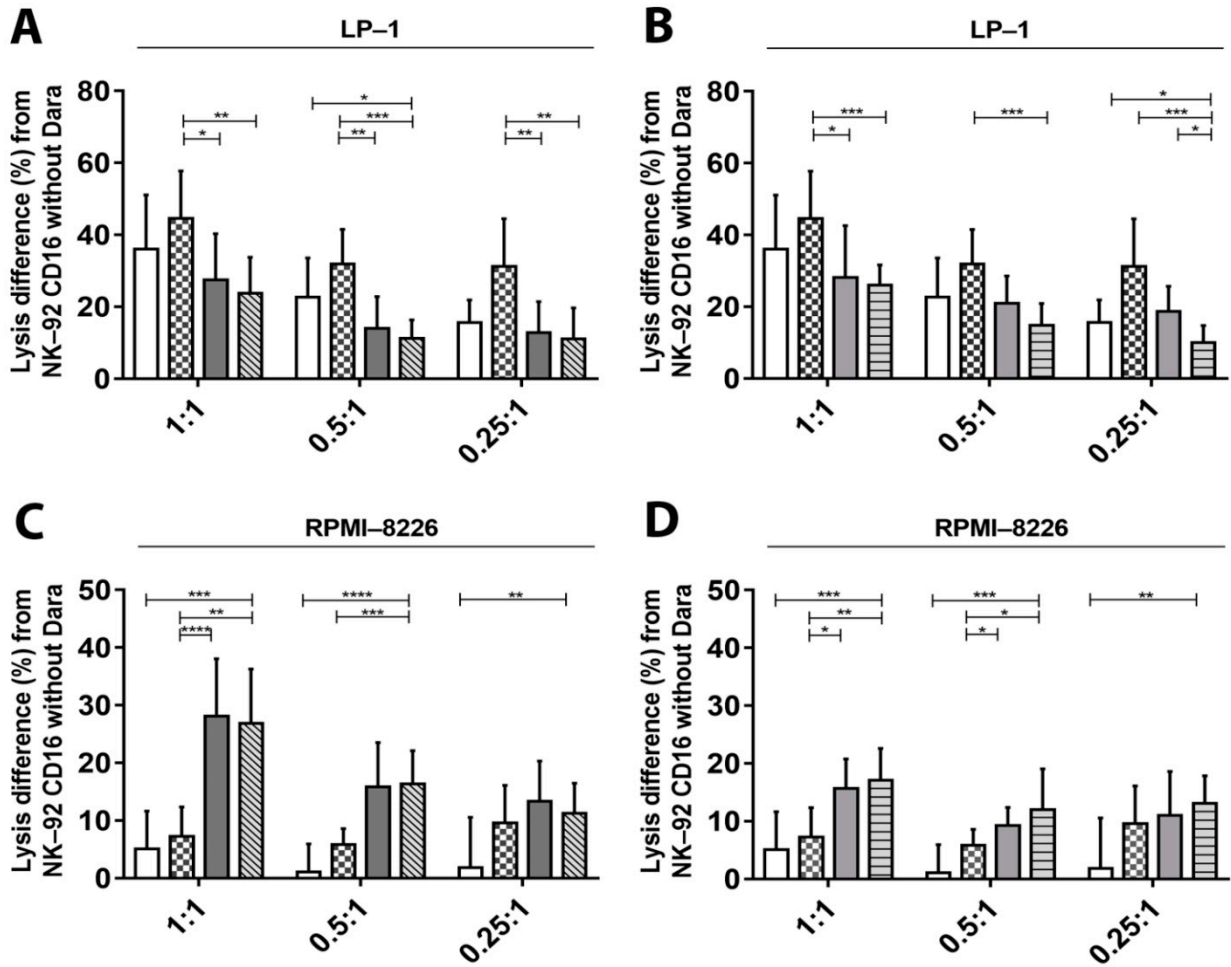

**Figure S6.** The effect of combining NKG2A blocking antibodies with CD38-upregulation on NK-92 – dependent tumor cell cytotoxicity, quantified by calcein release assay **(A)** Lysis differences in percentage of LP-1, pre-incubated or not with ATRA for 3 days, by NK-92 CD16 cells pre-incubated or not with anti-NKG2A mAb Z199 or ATRA + Z199 combination. **(B)** Lysis differences in percentage of LP-1, pre-incubated or not with IFNα for 3 days, by NK-92 CD16 cells pre-incubated or not with Z199, or IFNα + Z199combination. **(C)** Lysis differences in percentage of RPMI-8226, pre-incubated or not with ATRA for 3 days, by NK-92 CD16 cells pre-incubated or not with Z199, or ATRA + Z199combination. **(D)** Lysis differences in percentage of RPMI-8226, pre-incubated or not with IFNα for 3 days, by NK-92 CD16 cells pre-incubated or not with Z199, or IFNα + Z199combination. These different conditions were analyzed after 4 hours of incubation between conditions in presence of NK-92 CD16 cells without daratumumab and corresponding conditions in presence of daratumumab, in different E/T ratios (1:1, 0.5:1 or 0.25:1). All data are representative of seven (n = 7) independent experiments and represented as mean +/- standard error. Dara: daratumumab. \*: p < 0.05. \*\*: p < 0.01. \*\*\*: p < 0.001. \*\*\*\*: p < 0.0001.

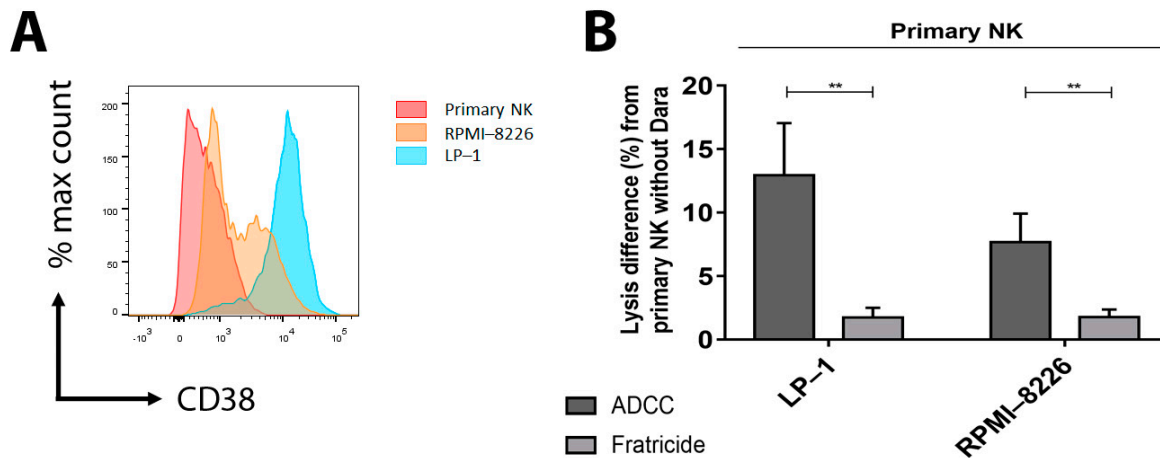

**Figure S7.** Primary NK – dependent tumor cell cytotoxicity and fratricide measured by calcein release assay. **(A)** CD38 expression in established cell lines (LP-1 and RPMI-8226) and in primary NK from buffy coat. Graph is representative of three independent experiments ( $n = 3$ ). **(B)** Comparison of lysis differences in percentages of ADCC and fratricide in co-cultures with LP-1/Primary NK or RPMI-8226/Primary NK co-cultures after 4 of incubation and with E/T ratio of 1:1. All data are representative of six independent experiments and represented as mean  $\pm$  standard error. \*\*:  $p < 0.01$ .
